# Supplementary material for: Galleria mellonella immune melanization is fungicidal during infection
Source: PubMed Central journal article supplement (PMC9744840; doi:10.1038/s42003-022-04340-6), 2022-12-12
Supplement: 42003_2022_4340_MOESM3_ESM.pdf [file 42003_2022_4340_MOESM3_ESM.pdf]

## Description of Additional Supplementary Files

Filename: Supplementary Movie 1\_C. neoformans timelapse

Description: Melanization response in hemolymph in response to *C. neoformans*.

Filename: Supplementary Movie 2\_C. neoformans timelapse

Description: Melanization response in hemolymph in response to *C. neoformans*

Filename: Supplementary Movie 3\_Melanin Ghost vs heat killed

Description: Melanization response in hemolymph in response to heat-killed *C. neoformans* and isolated fungal melanins.

Filename: Supplementary Movie 4\_Melanin ghost without hemocytes

Description: Melanization response in hemolymph in response to isolated fungal melanins.

Filename: Supplementary Movie 5\_Melanin ghost timelapse

Description: Melanization response in hemolymph in response to isolated fungal melanin.

Filename: Supplementary Movie 6\_Hemocyte-ghost interactions

Description: Timelapse of the interactions between the insect hemocytes and isolated fungal melanins

Filename: Supplementary Movie 7\_In situ nodule projection

Description: 3D Rendering of a fungal nodule within *G. mellonella* using different Z-stacked microscopy images.

Filename: Supplementary Movie 1\_C. neoformans timelapse

Description: Melanization response in hemolymph in response to *C. neoformans*.

Filename: Supplementary Movie 2\_C. neoformans timelapse

Description: Melanization response in hemolymph in response to *C. neoformans*.

Filename: Supplementary Movie 3\_Melanin Ghost vs heat killed

Description: Melanization response in hemolymph in response to heat-killed *C. neoformans* and isolated fungal melanins.

Filename: Supplementary Movie 4\_Melanin ghost without hemocytes

Description: Melanization response in hemolymph in response to isolated fungal melanins.

Filename: Supplementary Movie 5\_Melanin ghost timelapse

Description: Melanization response in hemolymph in response to isolated fungal melanin.

Filename: Supplementary Movie 6\_ Hemocyte-ghost interactions

Description: Timelapse of the interactions between the insect hemocytes and isolated fungal melanins

Filename: Supplementary Movie 7\_ In situ nodule projection

Description: 3D Rendering of a fungal nodule within *G. mellonella* using different Z-stacked microscopy images.

Filename: Supplementary Movie 8\_ Melanin Bloom Candida

Description: Melanization response in hemolymph in response to *C. albicans* yeast and hyphal forms.

Filename: Supplementary Movie 9\_ *Candida albicans* escape

Description: Examples of *C. albicans* surviving and growing through immune melanin-encapsulation.

Filename: Supplementary Movie 10\_ *Candida auris* pseudohyphae.

Description: Melanization response in hemolymph in response to *C. auris* yeast and pseudohyphal forms.

Filename: Supplementary Movie 11\_ *C. neoformans* Anticoagulation Buffer

Description: Timelapse of hemocytes and hemolymph interacting with *C. neoformans* in an anticoagulation buffer to prevent coagulation and melanization.

Filename: Supplementary Movie 12\_ No fungus timelapse

Description: Timelapse of hemocytes and hemolymph with no fungus or fungal component added.
